# Supplementary material
Source: PubMed Central journal article supplement (PMC6989800)
Supplement: JB.00491-19-s0001.pdf [file JB.00491-19-s0001.pdf]

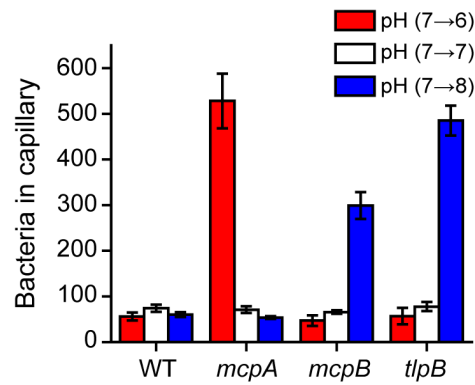

**Figure S1.** Wild-type *B. subtilis* prefers neutral regions (pH 7) as no accumulation towards acidic buffer (pH 6) or basic buffer (pH 8) is observed when cells were originally suspended in neutral buffer (pH 7). McpA mediates an attractant response to acidic buffer (pH 6) while McpB and TlpB mediate attractant responses to basic buffer (pH 8) when cells expressing them as their sole chemoreceptors were originally suspended in neutral buffer (pH 7). Error bars denote the standard deviation of three biological replicates performed on three separate days.

**A**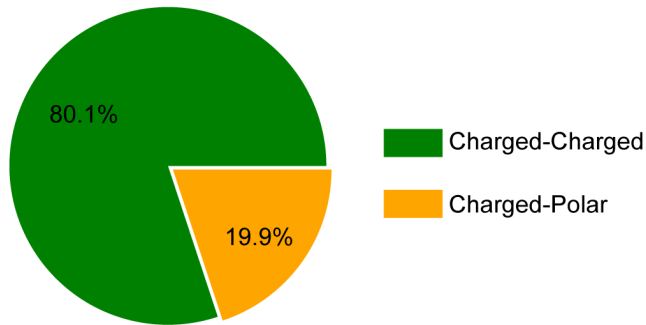**B**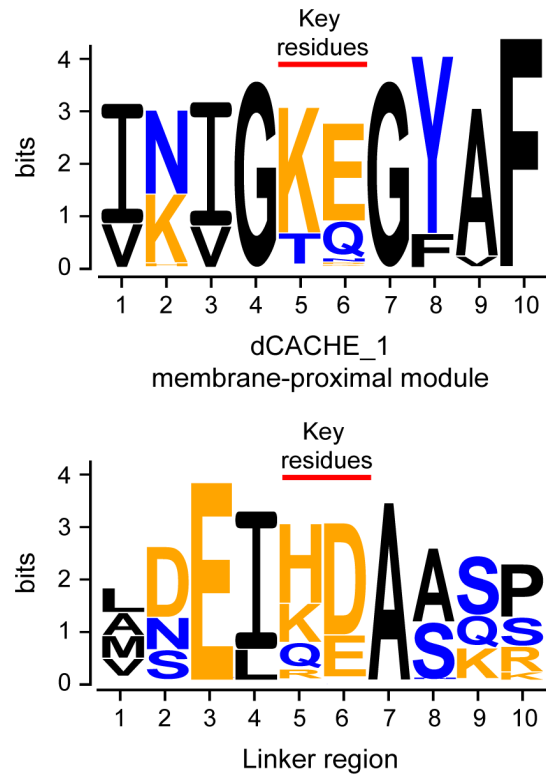

**Figure S3.** Conservation of pH-sensing amino-acid residues among *B. subtilis* species.

(A) Fraction of identified domains that contain charged amino acid(s) in positions equivalent to T199/Q200 in the membrane-proximal module and H273/E274 in the linker region of McpA (green), fraction that contain charged amino acid(s) in corresponding positions in the membrane-proximal module and polar amino acid(s) in corresponding positions in linker region of McpA or vice versa (orange). (B) Amino-acid sequence logos depicting conservation of the key pH-sensing and the neighboring residues in membrane-proximal module (top) and in linker region (bottom).

**Table S2.** Oligonucleotides used in this study

| Name   | Sequence                                             | Purpose                                                 |
|--------|------------------------------------------------------|---------------------------------------------------------|
| MP090  | 5'TCAACCAGCATAGTAAGAATACTAGTCTTACTGGACATCGGCAGTTCATA | Construction of pJSpe                                   |
| MP091  | 5'GAACTGCCGATGTCCAGTAAGACTAGTATTCTTACTATGCTGGTTGACGT |                                                         |
| PT108F | 5'GTCGACGGCCAACGAGGCCCATATAAAGCTGCACAGCTTG           | PCR of homology templates for <i>cheV</i> gene deletion |
| PT108R | 5'CTGTTTTTATTTCAATCCCTCGCTATTC                       |                                                         |
| PT109F | 5'AGGGATTGAAATAAAAACAGCCGTTGCC                       |                                                         |
| PT109R | 5' TAGAAAGGCCTTATTGGCCCAGTTTGTTCAAACATTGATTATC       |                                                         |
| PT110F | 5'TACGCACGTATAATATGCATACCG                           | Target sequence for <i>cheV</i> gene deletion           |
| PT110R | 5'AAACCGGTATGCATATTATACGTG                           |                                                         |
| PT123F | 5'AAGGCCAACGAGGCCAAGGGTTTGCGGTATATATC                | PCR of homology templates for <i>cheB</i> gene deletion |
| PT123R | 5'AAGGCCATGTTGGCCATTAAGCCCTCCTCATTAATAAAG            |                                                         |
| PT124F | 5'AAGGCCAACATGGCCATGGATATGAATCAGTATTTAGATG           |                                                         |
| PT124R | 5'AAGGCCTTATTGGCCGAATTGTTTTGGCTACTTCT                |                                                         |
| PT125F | 5'TACGTGTGTTTACATAGCACCGGG                           | Target sequence for <i>cheB</i> gene deletion           |
| PT125R | 5'AAACCCCGGTGCTATGTAAACACA                           |                                                         |
| PT120F | 5'AAGGCCAACGAGGCCATCTGACAGGAGACTCTTC                 | PCR of homology templates for <i>cheR</i> gene deletion |
| PT120R | 5'AAGGCCATGTTGGCCCAGCCGATACATTCTTTTATC               |                                                         |
| PT121F | 5'AAGGCCAACATGGCCCGTTGTAATACGCTGTATG                 |                                                         |
| PT121R | 5'AAGGCCTTATTGGCCTCGAACGTAAGGGCTTAC                  |                                                         |
| PT122F | 5'TACGGGAGTGCCGCCTGCTCAACG                           | Target sequence for <i>cheR</i> gene deletion           |
| PT122R | 5'AAACCGTTGAGCAGGCGGCACTCC                           |                                                         |
| PT222F | 5'ACCAGCATAGTAAGAATAAAGACATTTTGCAAACGC               | PCR of homology templates for <i>cheC</i> gene deletion |
| PT222R | 5'AAAGAGCTTTTAAGCTTGATCGGGCAC                        |                                                         |
| PT223F | 5'CAAGCTTAAAAGCTCTTTGTGCGCCTTAG                      |                                                         |
| PT223R | 5'CCGATGTCCAGTAAGAGAGGCGTAGGTATCAAATTTTAAG           |                                                         |
| PT221F | 5'TACGAACTGGGCAATATTTTAGCG                           | Target sequence for <i>cheC</i> gene deletion           |
| PT221R | 5'AAACCGCTAAAATATTGCCAGTT                            |                                                         |
| PT185F | 5'CGGCCAACGAGGCCCATCGTTAATATACTGCTCGGCTTC            | PCR of homology templates for <i>4mcp</i> gene deletion |
| PT185R | 5'CAAGTGAAGTAAAACGAGAAAGCGGCATATC                    |                                                         |
| PT186F | 5'CTCGTTTCAGTCACTTGCTCCTTCAGG                        |                                                         |
| PT186R | 5'AGGCCTTATTGGCCCTCAGCTTATCAATAATTTGCTTTC            |                                                         |
| PT184F | 5'TACGATAAGCGCTAACCGAAAGGG                           | Target sequence for <i>4mcp</i> gene deletion           |
| PT184R | 5'AAACCCCTTTTCGGTTAGCGCTTAT                          |                                                         |
| PT111F | 5'ACCAGCATAGTAAGAATATTGGCTCAAATAAAAAGCATAG           | PCR of homology templates for <i>mcpB</i> gene deletion |
| PT111R | 5'CAAGTGACAAACCGAAAAACAGCGCTATC                      |                                                         |
| PT112F | 5'TTTCGGTTTGTCACTTGCTCCTTCAGG                        |                                                         |
| PT112R | 5'CCGATGTCCAGTAAGATCAGCTTATCAATAATTTGCTTTC           |                                                         |

**Table S2.** Oligonucleotides used in this study (continued)

|                 |                                              |                                                                   |
|-----------------|----------------------------------------------|-------------------------------------------------------------------|
| PT113F          | 5'TACGCTGTCATTTCGCATACATTTT                  | Target sequence for <i>mcpB</i> gene deletion                     |
| PT113R          | 5'TACGCTGTCATTTCGCATACATTTT                  |                                                                   |
| PT250F          | 5'ACCAGCATAGTAAGAATAATCGTTAATATACTGCTCGGCTTC | PCR of homology templates for <i>tlpB</i> gene deletion           |
| PT250R          | 5'CAACGAGATGAAACGAGAAAGCGGCATATC             |                                                                   |
| PT251F          | 5'CTCGTTTCATCTCGTTGACTCCTCCTTTAAG            |                                                                   |
| PT251R          | 5'CCGATGTCCAGTAAGATCGACAGAAATTGCAAGTG        |                                                                   |
| PT249F          | 5'TACGAAGCCCGGTGCTGAACACTG                   | Target sequence for <i>tlpB</i> gene deletion                     |
| PT249R          | 5'AAACCAGTGTTCCAGCACCGGGCTT                  |                                                                   |
| PT323F          | 5'ACCAGCATAGTAAGAATATGTCCAATCGCCGGAACC       | PCR of homology templates for <i>mcpA</i> gene deletion           |
| PT323R          | 5'GAAATGAATGTAAGCCTTAACACCCAAGCTTGTTG        |                                                                   |
| PT324F          | 5'TAAGGCTTACATTCATTTCTCCTTTTTTATG            |                                                                   |
| PT324R          | 5'CCGATGTCCAGTAAGAAGCAAAGGGGAGACACTC         |                                                                   |
| PT322F          | 5'TACGGAAGCGGAGCAAGTCGTACG                   | Target sequence for <i>mcpA</i> gene deletion                     |
| PT322R          | 5'AAACCGTACGACTTGCTCCGCTTC                   |                                                                   |
| PT327F          | 5'ACCAGCATAGTAAGAATACAGTTCCTGATTGTTTCATTAG   | PCR of homology templates for <i>tlpA</i> gene deletion           |
| PT327R          | 5'TTCAAAGGAATAGGTCTAAAATACTATTTATTTATGGG     |                                                                   |
| PT328F          | 5'TTAGACCTATTCTTTTTGAACCTTCTTTC              |                                                                   |
| PT328R          | 5'CCGATGTCCAGTAAGAGAACTCGATTAATCAATCTGTTC    |                                                                   |
| PT326F          | 5'TACGCGTCAAACGGTGGATGGGTC                   | Target sequence for <i>tlpA</i> & <i>mcpA-tlpA</i> genes deletion |
| PT326R          | 5'AAACGACCCATCCACCGTTTGACG                   |                                                                   |
| PT354F          | 5'CAACCAGCATAGTAAGAATAATACTTGGTTTGTCCAATCG   | PCR of homology templates for <i>mcpA-tlpA</i> genes deletion     |
| PT354R          | 5'TCAAAGGAATAAGCCTTAACACCCAAG                |                                                                   |
| PT355F          | 5'TTAAGGCTTATTCCTTTTGAACCTTCTTTC             |                                                                   |
| PT355R          | 5'ACTGCCGATGTCCAGTAAGAATTAATCAATCTGTTCCAGCAG |                                                                   |
| <i>tlpA</i> -F  | 5'GTAGAATTTCGAGATGGCAGAAGAGCTTCG             | Construction of pAIN750 <i>tlpA</i>                               |
| <i>tlpA</i> -R  | 5'TGAGGATCCGATCGACAGAAAGGAAACGAG             |                                                                   |
| <i>tlpB</i> -F  | 5'CGCGAATTCAGAAATCAGCTCGTCTGC                | Construction of pAIN750 <i>tlpB</i>                               |
| <i>tlpB</i> -R  | 5'TATGGATCCCTCTACGCCTTTAGGTAGCTG             |                                                                   |
| <i>tlpC</i> -F  | 5'GGCGAATTCAACTATGTTCACTCACCACG              | Construction of pAIN750 <i>tlpC</i>                               |
| <i>tlpC</i> -R  | 5'TGAGGATTTCGATGTCCGTCGTGATGTT               |                                                                   |
| <i>yfmS</i> -F  | 5'CTGGAATTCGAAACGCATTGAAACAGG                | Construction of pAIN750 <i>yfmS</i>                               |
| <i>yfmS</i> -R  | 5'ACTGGATCCGCTCATGGTTCTATCAATC               |                                                                   |
| <i>yvaQ</i> -F  | 5'CTGGAATTCGGCACTAGCACCCATATTAGG             | Construction of pAIN750 <i>yvaQ</i>                               |
| <i>yvaQ</i> -R  | 5'TGAGGATCCAAACGCAACAAACGGAAGT               |                                                                   |
| <i>hemAT</i> -F | 5'CAGGAATTCATCTGGCGAAGTTGTAGAGG              | Construction of pAIN750 <i>hemAT</i>                              |
| <i>hemAT</i> -R | 5'ATAGGATCCCACCGTTCCGATTACATT                |                                                                   |

**Table S2.** Oligonucleotides used in this study (continued)

|        |                                                 |                                          |
|--------|-------------------------------------------------|------------------------------------------|
| yoaH-F | 5'CTGAATGCAGAATTCCTATAAAACTTGATAACACGTGTCGAT    | Construction of pAIN750yoaH              |
| yoaH-R | 5'ACGTTGTGCGGATCCATTAGAAAAGGATTGGCTGAAACTCA     |                                          |
| PT233F | 5'CATTCAATTTCTCCTTTTTTATGCTACC                  | Long PCR for construction of pPT065      |
| PT237R | 5'AATGTTGCCGCTTCCTCTG                           |                                          |
| PT238F | 5'AGGAAGCGGCAACATTTTCTACAGACGTTTGAATAACG        | PCR of insert for construction of pPT065 |
| PT234R | 5'TAAAAAAGGAGAAATGAATGATGGGAAAATTCATACAATG      |                                          |
| PT233F | 5'CATTCAATTTCTCCTTTTTTATGCTACC                  | Long PCR for construction of pPT063      |
| PT233R | 5'ATTGTCTTGCCGCAGCTATTATC                       |                                          |
| PT234F | 5'CTGCGGCCAAGACAATAACCGCAGTGTTTCAGCAC           | PCR of insert for construction of pPT063 |
| PT234R | 5'TAAAAAAGGAGAAATGAATGATGGGAAAATTCATACAATG      |                                          |
| PT359F | 5'CATTCAATTTCTCCTTTTTTATG                       | Long PCR for construction of pPT143      |
| PT359R | 5'AAGATCGGCGGCACCATG                            |                                          |
| PT360F | 5'TACATGGTGCCGCCGATCTTCCAGCCAGTCAGTTTATTG       | PCR of insert for construction of pPT143 |
| PT360R | 5'TAAAAAAGGAGAAATGAATGATGGGAAAATTCATACAATG      |                                          |
| PT548F | 5'CATTCAATTTCTCCTTTTTTATG                       | Long PCR for construction of pPT224      |
| PT548R | 5'GATTTTCAATACACCATGGATG                        |                                          |
| PT549F | 5'CCATGGTGTATTGAAAATCGCCTTCTTTTTTGAATATAC       | PCR of insert for construction of pPT224 |
| PT549R | 5'AAAAAAGGAGAAATGAATGATGGGAAAATTCATACAATG       |                                          |
| PT556F | 5'TGCGATAACGCCTGAACCATC                         | Long PCR for construction of pPT233      |
| PT556R | 5'ATTGTCTTGCCGCAGCTATTATC                       |                                          |
| PT557F | 5'CTGCGGCCAAGACAATAACCGCAGTGTTTCAGCAC           | PCR of insert for construction of pPT233 |
| PT557R | 5'TTCAGGCGTTATCGCACTAGATTTAAACCTGGATGAAGTG      |                                          |
| PT376F | 5'CATTCAATTTCTCCTTTTTTATGCTAC                   | Long PCR for construction of pPT234      |
| PT561R | 5'ATCAACATGACGATTGAAAATCTG                      |                                          |
| PT562F | 5'TTTCAATCGTCATGTTGATCGCTATAACCCCTGAACC         | PCR of insert for construction of pPT234 |
| PT562R | 5'AAAAAAGGAGAAATGAATGATGGGAAAATTCATACAATGGATC   |                                          |
| PT563F | 5'GATGTTGACTTTTTTGGTTGTTTTAG                    | Long PCR for construction of pPT236      |
| PT563R | 5'ATTGTCTTGCCGCAGCTATTATC                       |                                          |
| PT564F | 5'CTGCGGCCAAGACAATAACCGCAGTGTTTCAGCAC           | PCR of insert for construction of pPT236 |
| PT564R | 5'CAACCAAAAAAGTCAACATCGGAAAAGAAGCCTTGCATTTATTAC |                                          |
| PT565F | 5'AGTTCCTGATTGTTTCATTAGGGTG                     | Long PCR for construction of pPT237      |
| PT565R | 5'ATTGTCTTGCCGCAGCTATTATC                       |                                          |
| PT566F | 5'CTGCGGCCAAGACAATAACCGCAGTGTTTCAGCAC           | PCR of insert for construction of pPT237 |
| PT566R | 5'AATGAACAATCAGGAACTACCGTTCCGGCGATTGG           |                                          |
| PT341F | 5'ACTGACAAAATATGTGCCCGC                         | Construction of pPT129                   |
| PT341R | 5'GAATTGCATGAAGCTTCAAGC                         |                                          |
| PT569F | 5'TGATTCTTTTTGATGCAGTAAGC                       | Construction of pPT162 and pPT202        |
| PT569R | 5'AAATCGGAACACAAGGCTTTGC                        |                                          |

**Table S2.** Oligonucleotides used in this study (continued)

|        |                                               |                                              |
|--------|-----------------------------------------------|----------------------------------------------|
| PT520F | 5'ATGAAATCCAAGACGCAGCCCAG                     | Construction of pPT196                       |
| PT520R | 5'AGTACGCTGCAAAATAAATTAG                      |                                              |
| PT570F | 5'GTAGCCTTCTTTGCCGATGTTG                      | Construction of pPT163 and pPT222            |
| PT570R | 5'GCATTTATCATGACGAAGGAC                       |                                              |
| PT304F | 5'ACCGGGCTTGAAGCATTTTG                        | Construction of pPT101                       |
| PT304R | 5'GCTGAACACTGCGGTTATCATTC                     |                                              |
| PT314F | 5'AAATCCATCAGGCAGCCCAG                        | Construction of pPT107                       |
| PT314R | 5'CATCCAAATACATGGTGCCG                        |                                              |
| GB006F | 5'CATTCATTTCTCCTTTTTTATG                      | Long PCR for construction of pGB45           |
| GB006R | 5'TAAGCCTTAACACCCAAG                          |                                              |
| GB007F | 5'TTGGGTGTTAAGGCTTATTATTTGTCTACTTTAAATTGTTTTG | PCR of <i>tlpA</i> for construction of pGB45 |
| GB007R | 5'TAAAAAAGGAGAAATGAATGATGAAAAAACACTCACCAC     |                                              |
